# Supplementary material for: Tough dual-network Janus hydrogel patch for universal and reversible adhesion
Source: Royal Society of Chemistry journal article supplement (doi:10.1039/d5ra04058b), 2025-01-01
Supplement: d5ra04058b1.pdf [file d5ra04058b1.pdf]

## Supporting Information

### Tough Dual-Network Janus Hydrogel Patch for Universal and Reversible Adhesion

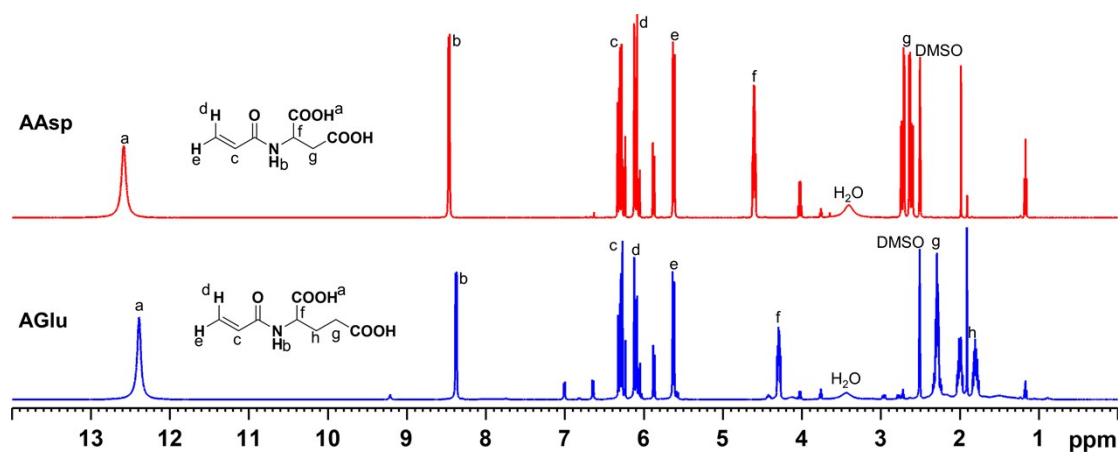

Figure S1.  $^1\text{H}$ -NMR spectra of AAsp and AGlu.

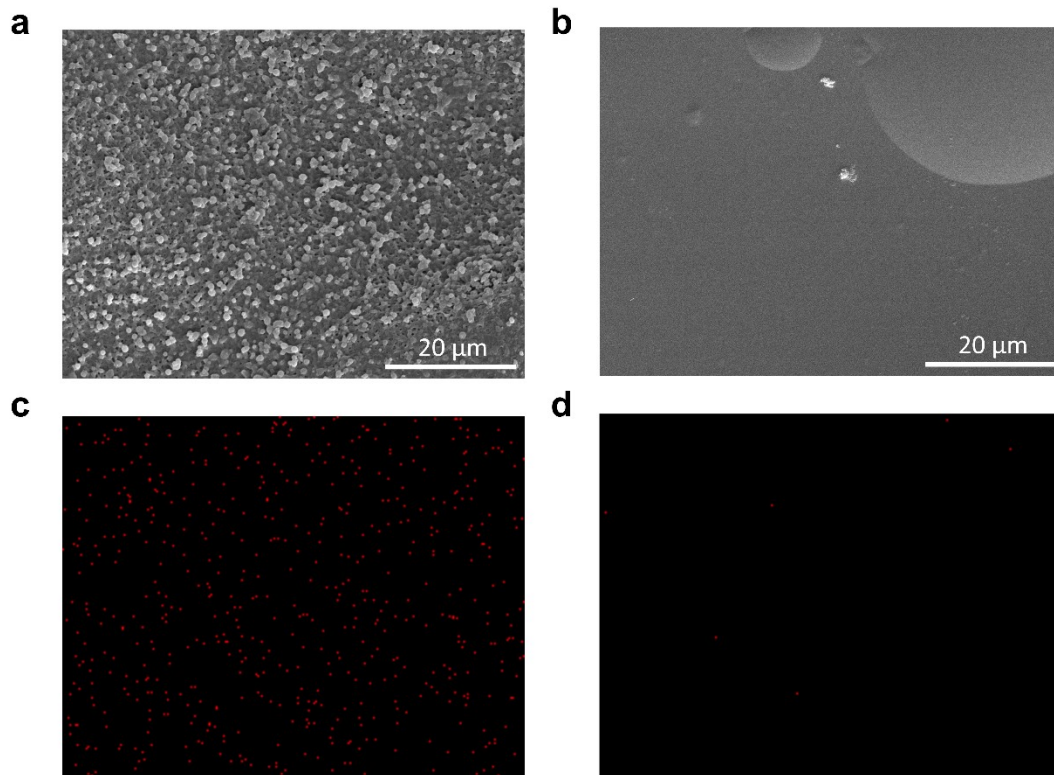

Figure S2. (a)(c) SEM and EDS images of the adhesive surface of Janus hydrogel. (b)(d) SEM and EDS images of the non-adhesive surface of Janus hydrogel.

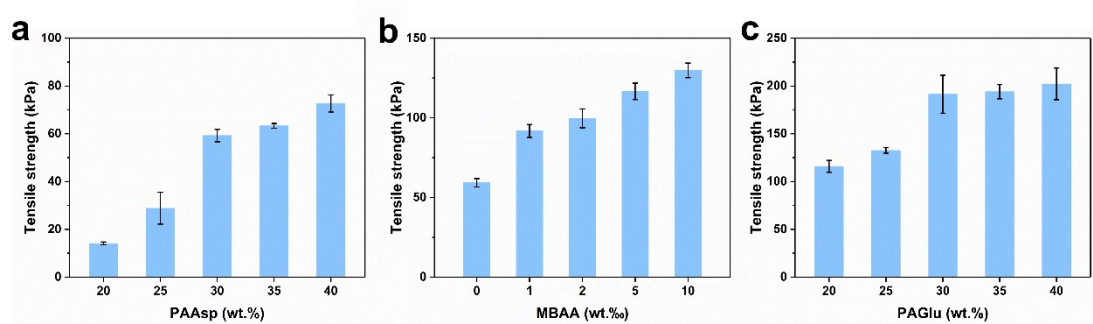

**Figure S3.** (a) Tensile strength of PAAsp hydrogels with different solid contents. (b) Tensile strength of PAAsp hydrogel with different content of MBAA. (c) Tensile strength of PAGlu hydrogels with different solid contents.

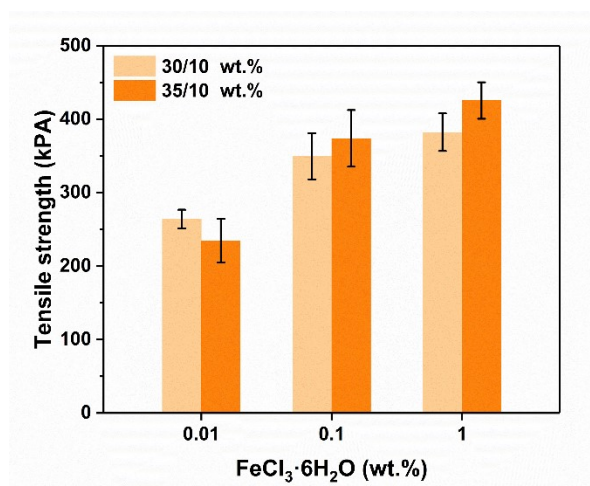

**Figure S4.** Tensile strength of PAAsp/PAADA Janus hydrogels with different  $\text{FeCl}_3$  concentration.

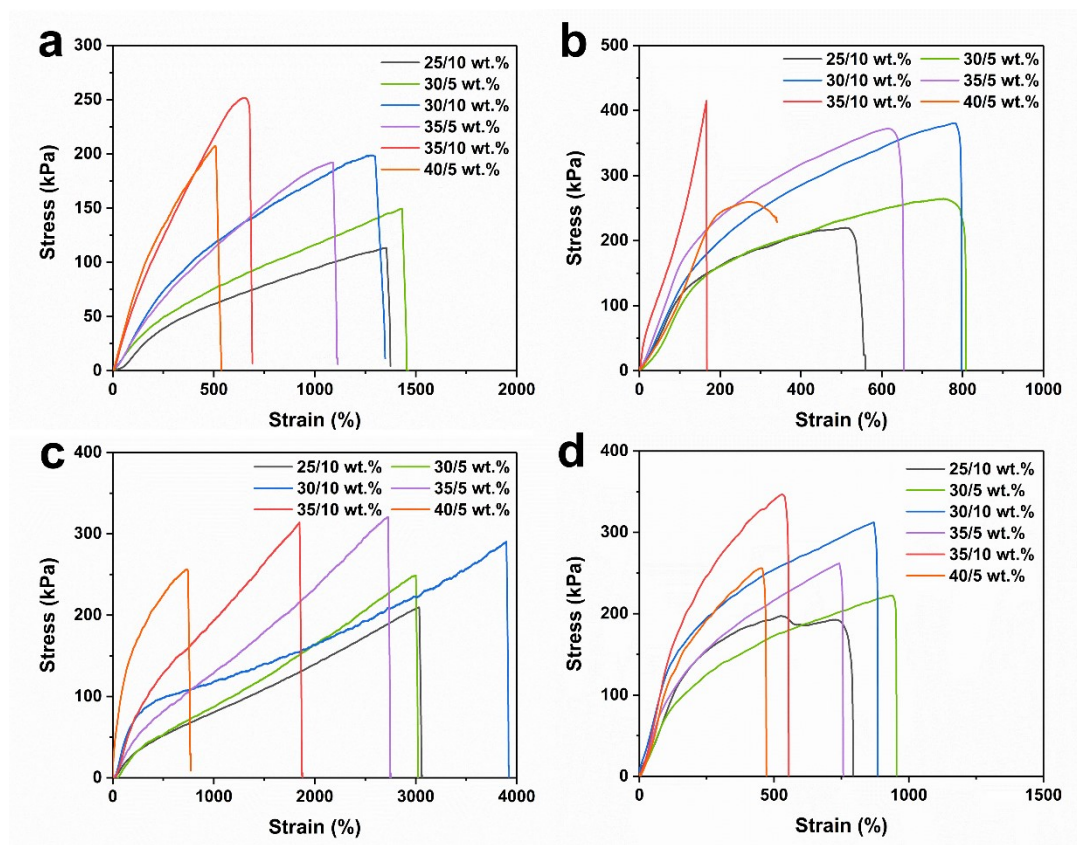

**Figure S5.** (a) Tensile stress–strain curves of PAAsp/PAADA hydrogels. (b) Tensile stress–strain curves of PAAsp/PAADA Janus hydrogels. (c) Tensile stress–strain curves of PAGlu/PAADA hydrogels. (d) Tensile stress–strain curves of PAGlu/PAADA Janus hydrogels.

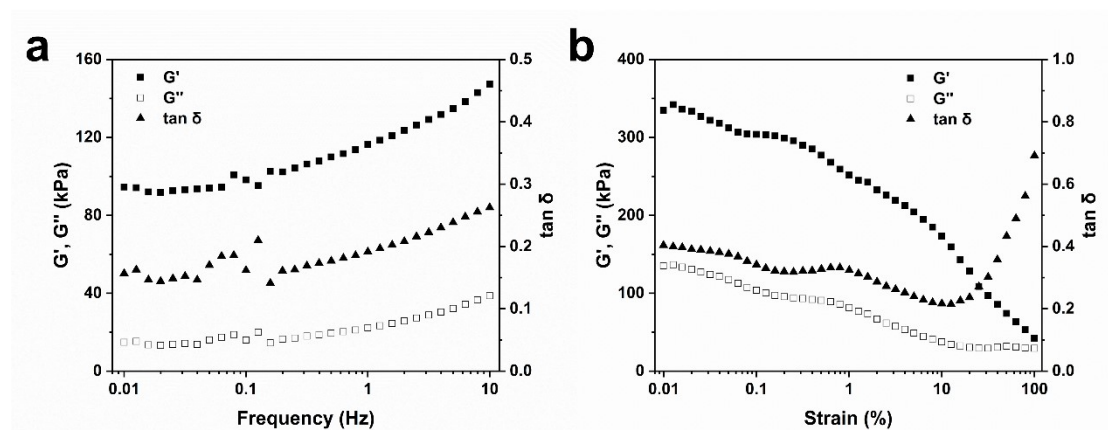

**Figure S6.** (a) Dynamic frequency sweep and (b) Strain sweep of the P(AAsp-AGlu)/PAADA Janus hydrogel.

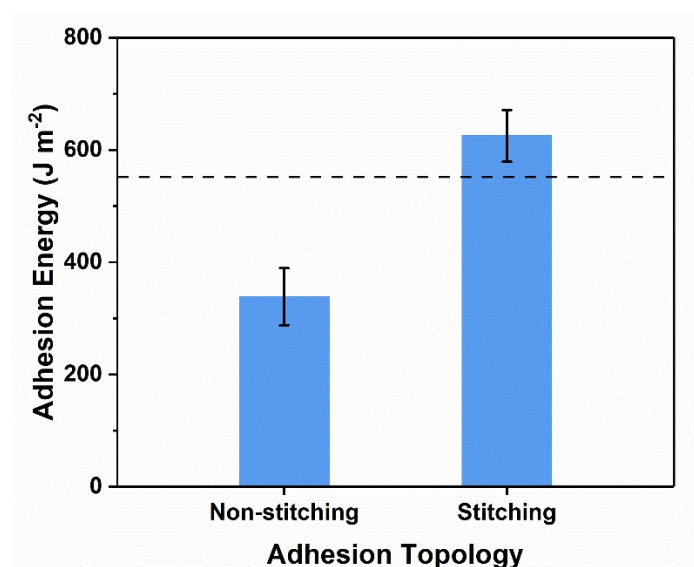

**Figure S7.** The influence of adhesion topology on adhesion energy (dashed line is the control using PAAm without NaIO<sub>4</sub> as adherend).
